# Supplementary material for: Comprehensive investigation of the enzymatic oligomerization of esculin by laccase in ethanol : water mixtures
Source: Royal Society of Chemistry journal article supplement (doi:10.1039/c7ra06972c), 2017-01-01
Supplement: c7ra06972c1.pdf [file c7ra06972c1.pdf]

## Supplementary material

Table S1 – Antimicrobial activity of esculin oligomer fractions from reaction A with esculin at 2 g/L in acetate buffer (0.1 M, pH 5), expressed as colony forming units per mL present in the cell culture after 24 h of incubation with test compounds

|                             | <i>E. coli</i>    | <i>Salmonella</i>    |
|-----------------------------|-------------------|----------------------|
|                             | CFU/mL            |                      |
| Negative control            | 0                 |                      |
| Positive control            | $1.79 \cdot 10^9$ | $3.35 \cdot 10^{10}$ |
| <b>Pellet</b>               |                   |                      |
| 7.5 g/L                     | $1.15 \cdot 10^9$ | $2.67 \cdot 10^{10}$ |
| 5 g/L                       | $1.66 \cdot 10^9$ | $6.00 \cdot 10^{10}$ |
| 2.5 g/L                     | $4.00 \cdot 10^9$ | $5.94 \cdot 10^{10}$ |
| <b>Oligomers &gt;10 kDa</b> |                   |                      |
| 7.5 g/L                     | $2.63 \cdot 10^9$ | $1.73 \cdot 10^{10}$ |
| 5 g/L                       | $1.94 \cdot 10^9$ | $1.54 \cdot 10^{10}$ |
| 2.5 g/L                     | $4.00 \cdot 10^9$ | $2.40 \cdot 10^{10}$ |

Table S2 –MALDI-TOF results of the supernatant from reaction A and suggested compounds, detected either as the protonated compound and/or the Na-adduct.

| Observed mass (Da) | Intensity | Suggested compound     | Theor. mass (Da) | $\Delta$ mass (Da) |
|--------------------|-----------|------------------------|------------------|--------------------|
| 362.88             | 594.52    | (E+Na) <sup>+</sup>    | 363.26           |                    |
| 701.14             | 1329.08   | (2E+Na) <sup>+</sup>   | 701.53           | 338.26             |
| 1039.27            | 2315.97   | (3E+Na) <sup>+</sup>   | 1039.79          | 338.13             |
| 1377.37            | 3899.59   | (4E+Na) <sup>+</sup>   | 1378.06          | 338.10             |
| 1715.45            | 1149.58   | (5E+Na) <sup>+</sup>   | 1716.33          | 338.08             |
| 2053.52            | 437.9     | (6E+Na) <sup>+</sup>   | 2054.59          | 338.08             |
| 2391.61            | 131.11    | (7E+Na) <sup>+</sup>   | 2392.86          | 338.09             |
| 2730.66            | 64.13     | (8E+Na) <sup>+</sup>   | 2731.13          | 339.05             |
| 3069.73            | 33.83     | (9E+Na) <sup>+</sup>   | 3069.39          | 339.07             |
| 340.90             | 570.24    | E <sup>+</sup>         | 341.28           |                    |
| 679.06             | 276.13    | 2E <sup>+</sup>        | 679.55           | 338.16             |
| 1015.26            | 88.2      | 3E <sup>+</sup>        | 1017.81          | 336.21             |
| 1355.30            | 62.3      | 4E <sup>+</sup>        | 1356.08          | 340.04             |
| 1693.46            | 50.0      | 5E <sup>+</sup>        | 1694.35          | 338.16             |
| 539.00             | 218.6     | (2E-G+Na) <sup>+</sup> | 539.39           |                    |
| 877.19             | 163.48    | (3E-G+Na) <sup>+</sup> | 877.65           | 338.19             |
| 1215.29            | 236.74    | (4E-G+Na) <sup>+</sup> | 1215.92          | 338.10             |
| 1553.37            | 165.95    | (5E-G+Na) <sup>+</sup> | 1554.19          | 338.09             |
| 1891.45            | 102.47    | (6E-G+Na) <sup>+</sup> | 1892.45          | 338.08             |
| 2231.54            | 60.18     | (7E-G+Na) <sup>+</sup> | 2230.72          | 340.09             |
| 517.00             | 230.84    | (2E-G) <sup>+</sup>    | 517.41           |                    |
| 855.20             | 220.67    | (3E-G) <sup>+</sup>    | 855.67           | 338.21             |
| 1193.29            | 159.95    | (4E-G) <sup>+</sup>    | 1193.94          | 338.09             |
| 1531.39            | 178.52    | (5E-G) <sup>+</sup>    | 1532.21          | 338.10             |
| 1869.48            | 92.78     | (6E-G) <sup>+</sup>    | 1870.47          | 338.09             |
| 2207.54            | 55.99     | (7E-G) <sup>+</sup>    | 2208.74          | 338.06             |
| 354.86             | 854.67    | 2e <sup>+</sup>        | 355.28           |                    |
| 530.97             | 1315.9    | 3e <sup>+</sup>        | 531.40           | 176.10             |
| 707.05             | 1275.64   | 4e <sup>+</sup>        | 707.53           | 176.09             |
| 883.13             | 541.63    | 5e <sup>+</sup>        | 883.65           | 176.07             |
| 1059.15            | 342.17    | 6e <sup>+</sup>        | 1059.78          | 176.02             |
| 1235.18            | 159.59    | 7e <sup>+</sup>        | 1235.90          | 176.03             |
| 1411.23            | 74.56     | 8e <sup>+</sup>        | 1412.03          | 176.05             |
| 1587.38            | 59.76     | 9e <sup>+</sup>        | 1588.16          | 176.15             |
| 1763.39            | 46.38     | 10e <sup>+</sup>       | 1764.28          | 176.01             |

Table S2 (cont) –MALDI-TOF results of the supernatant from reaction A and suggested compounds, detected either as the protonated compound and/or the Na-adduct.

| <b>Observed mass (Da)</b> | <b>Intensity</b> | <b>Suggested compound</b> | <b>Theor. mass (Da)</b> | <b>Δ mass (Da)</b> |
|---------------------------|------------------|---------------------------|-------------------------|--------------------|
| 525.00                    | 134.36           | (E+G+Na) <sup>+</sup>     | 525.40                  |                    |
| 863.17                    | 66.41            | (2E+G+Na) <sup>+</sup>    | 863.67                  | 338.17             |
| 502.96                    | 153.23           | (E+G) <sup>+</sup>        | 503.42                  |                    |
| 841.17                    | 82.07            | (2E+G) <sup>+</sup>       | 841.69                  | 338.21             |
| 1179.29                   | 62.16            | (3E+G) <sup>+</sup>       | 1179.96                 | 338.12             |
| 1517.40                   | 60.55            | (4E+G) <sup>+</sup>       | 1518.22                 | 338.11             |
| 1855.46                   | 49.72            | (5E+G) <sup>+</sup>       | 1856.49                 | 338.06             |

Table S3 –MALDI-TOF results of the pellet from reaction A and suggested compounds, detected either as the protonated compound and/or the Na-adduct.

| Observed mass | Intensity | Suggested compound     | Theoretical mass | $\Delta$ mass (Da) |
|---------------|-----------|------------------------|------------------|--------------------|
| 362.85        | 68.62     | (E+Na) <sup>+</sup>    | 363.26           |                    |
| 701.07        | 211.72    | (2E+Na) <sup>+</sup>   | 701.53           | 338.22             |
| 1039.17       | 238.2     | (3E+Na) <sup>+</sup>   | 1039.79          | 338.10             |
| 1377.24       | 1635.12   | (4E+Na) <sup>+</sup>   | 1378.06          | 338.07             |
| 1715.29       | 231.29    | (5E+Na) <sup>+</sup>   | 1716.33          | 338.05             |
| 2053.35       | 121.29    | (6E+Na) <sup>+</sup>   | 2054.59          | 338.06             |
| 340.85        | 169.46    | E <sup>+</sup>         | 341.28           |                    |
| 679.00        | 208.74    | 2E <sup>+</sup>        | 679.55           | 338.14             |
| 538.85        | 192.06    | (2E-G+Na) <sup>+</sup> | 539.39           |                    |
| 1215.18       | 88.96     | (4E-G+Na) <sup>+</sup> | 1215.92          |                    |
| 1553.22       | 39.17     | (5E-G+Na) <sup>+</sup> | 1554.19          | 338.04             |
| 516.93        | 122.85    | (2E-G) <sup>+</sup>    | 517.41           |                    |
| 855.08        | 102.87    | (3E-G) <sup>+</sup>    | 855.67           | 338.15             |
| 1193.19       | 112.27    | (4E-G) <sup>+</sup>    | 1193.94          | 338.11             |
| 1531.244      | 79.25     | (5E-G) <sup>+</sup>    | 1532.206         | 338.06             |
| 354.82        | 1152.75   | 2e <sup>+</sup>        | 355.28           |                    |
| 530.92        | 1268.18   | 3e <sup>+</sup>        | 531.40           | 176.10             |
| 707.00        | 3028.43   | 4e <sup>+</sup>        | 707.53           | 176.08             |
| 883.06        | 770.27    | 5e <sup>+</sup>        | 883.65           | 176.06             |
| 1059.07       | 762.8     | 6e <sup>+</sup>        | 1059.78          | 176.01             |
| 1235.07       | 174       | 7e <sup>+</sup>        | 1235.90          | 176.01             |
| 1411.13       | 259.67    | 8e <sup>+</sup>        | 1412.03          | 176.05             |
| 1587.10       | 54.64     | 9e <sup>+</sup>        | 1588.16          | 175.97             |
| 502.89        | 121.52    | (E+G) <sup>+</sup>     | 503.42           |                    |

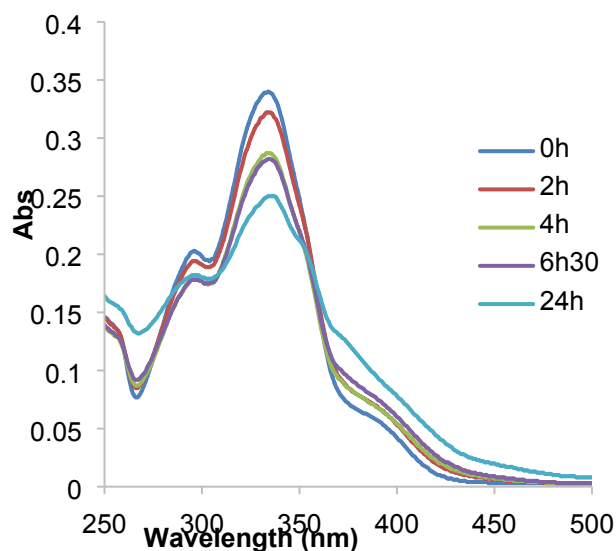

**Figure S1.** UV-vis spectrum of the laccase-transformation products from reaction B: esculin at 5 g/L in 30:70 (v/v) ethanol/acetate buffer

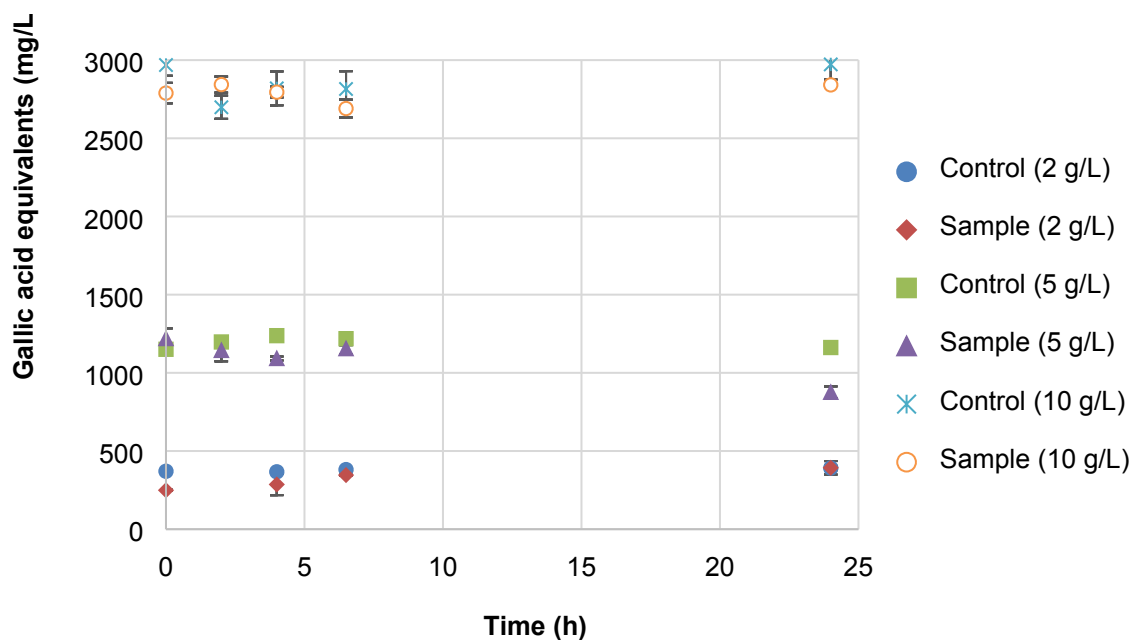

**Figure S2.** Evaluation of the Total Phenolic Compounds (TPC) content of the supernatants from reactions A (2 g/L esculin in acetate buffer), B (5 g/L esculin in ethanol:acetate buffer, 30:30) and C (10 g/L esculin in ethanol:acetate buffer, 50:50)

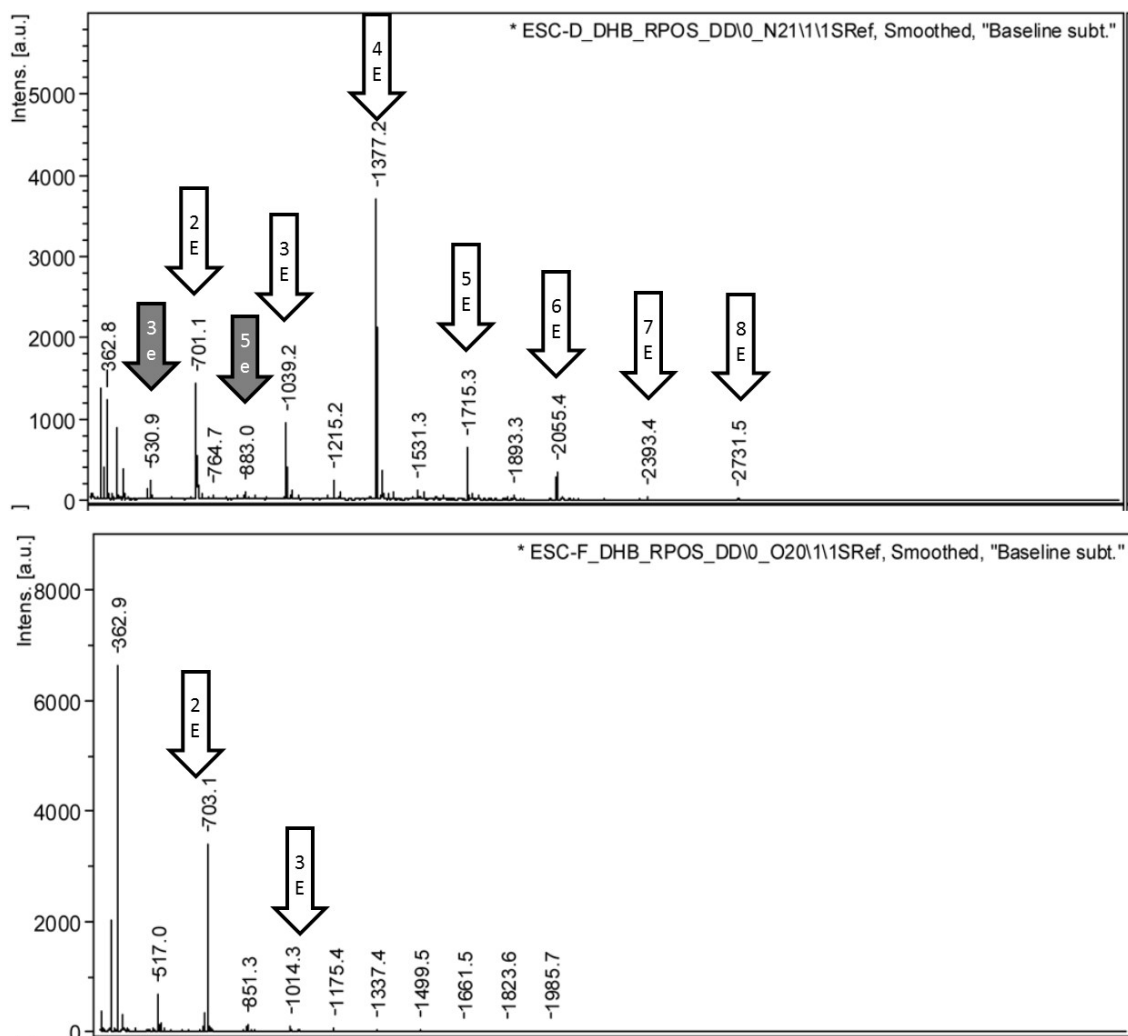

**Figure S3.** MALDI-TOF analysis of supernatants from reactions B (upper figure) and C (lower figure) (esculin at 5 and 10 g/L in 30% and 50% ethanol, respectively). XE or Xe means oligomer of esculetin or esculin, respectively, with a DP of X

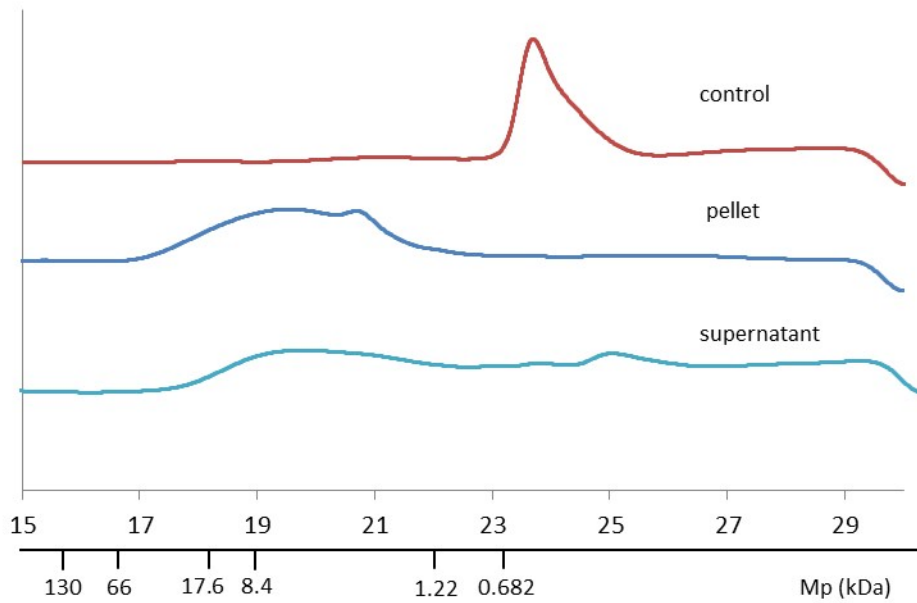

**Figure S4** –Relative masses of polymers from reaction A were evaluated by size exclusion chromatography(HPLC-HP1100 with RI detector, Agilent POLARGEL-L (100-60000) 300 x 7.5 mm and 8  $\mu$ m column, 50  $^{\circ}$ C). Dimethylformamide (DMF) with 1% LiBr was used as a mobile phase (0.4 mL/min). Control contained esculin in acetate buffer. Molecular mass calibration was obtained using standards of polystyrene (Sigma-Aldrich)
